# Supplementary material for: Synthesis of Potent Inhibitors of β-Ketoacyl-Acyl Carrier Protein Synthase III as Potential Antimicrobial Agents
Source: MDPI journal article supplement (doi:10.3390/molecules17054770), 2012-04-25

## Directions:

The  $^1\text{H}$ -NMR spectra were measured using a multinuclear Fourier transform (FT)-NMR spectrometer ARX400 (Bruker); Chemical shifts are referenced to internal SiMe<sub>4</sub>. The serial number in the PDF (like LYM018) is the No. of compound libraries. To help understand, please refer to Table 1

**Table 1.** The corresponding relation between Compound library No. and Submission No.

| Compound library No. | Submission No. |
|----------------------|----------------|
| LYM018               | 7a             |
| LYM019               | 7b             |
| LYM020               | 7c             |
| LYM021               | 7d             |
| LYM022               | 7e             |
| LYM023               | 7f             |
| LYM024               | 7g             |
| LYM025               | 7h             |

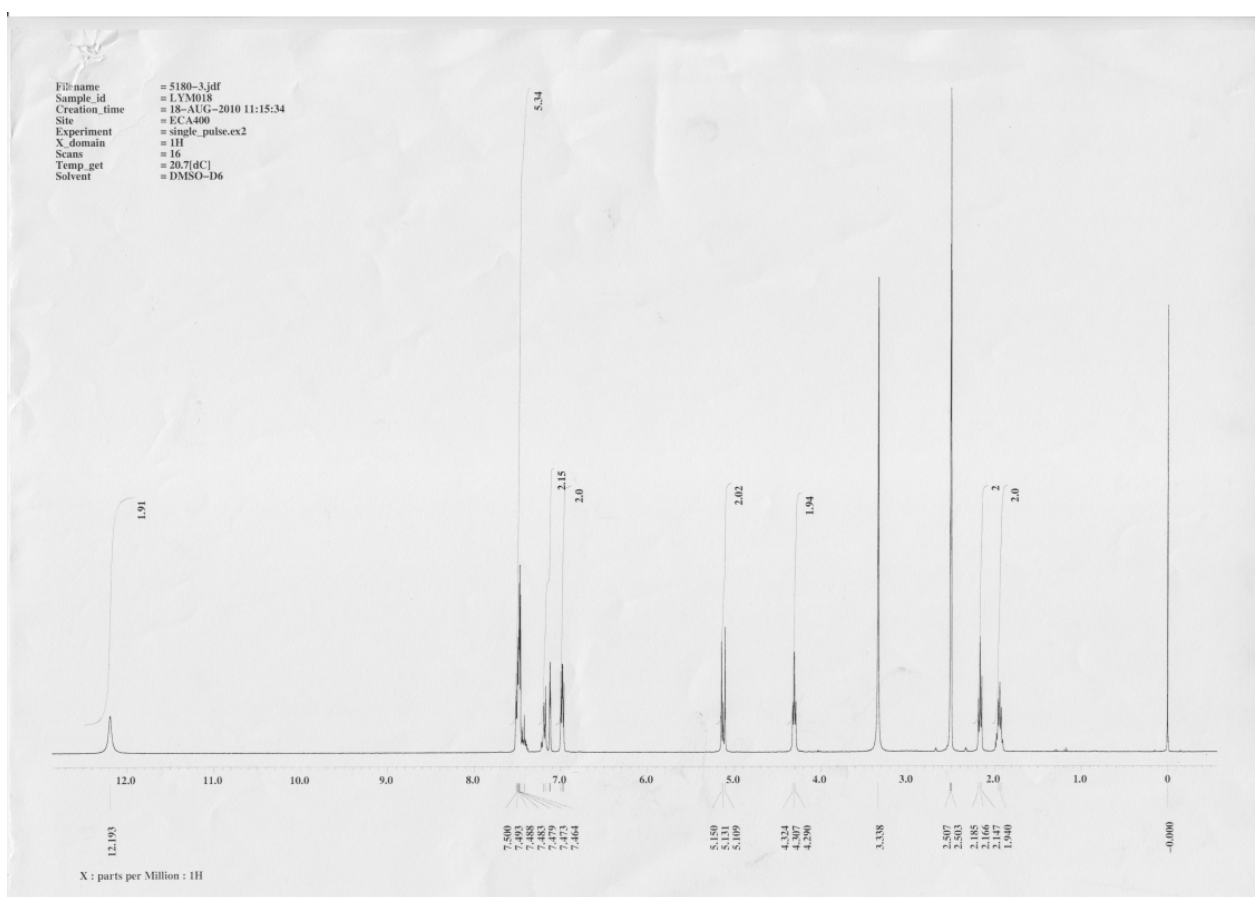

The  $^1\text{H}$ -NMR spectrum of LYM018

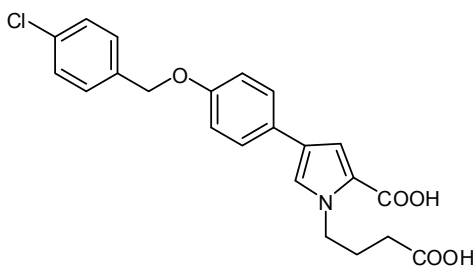

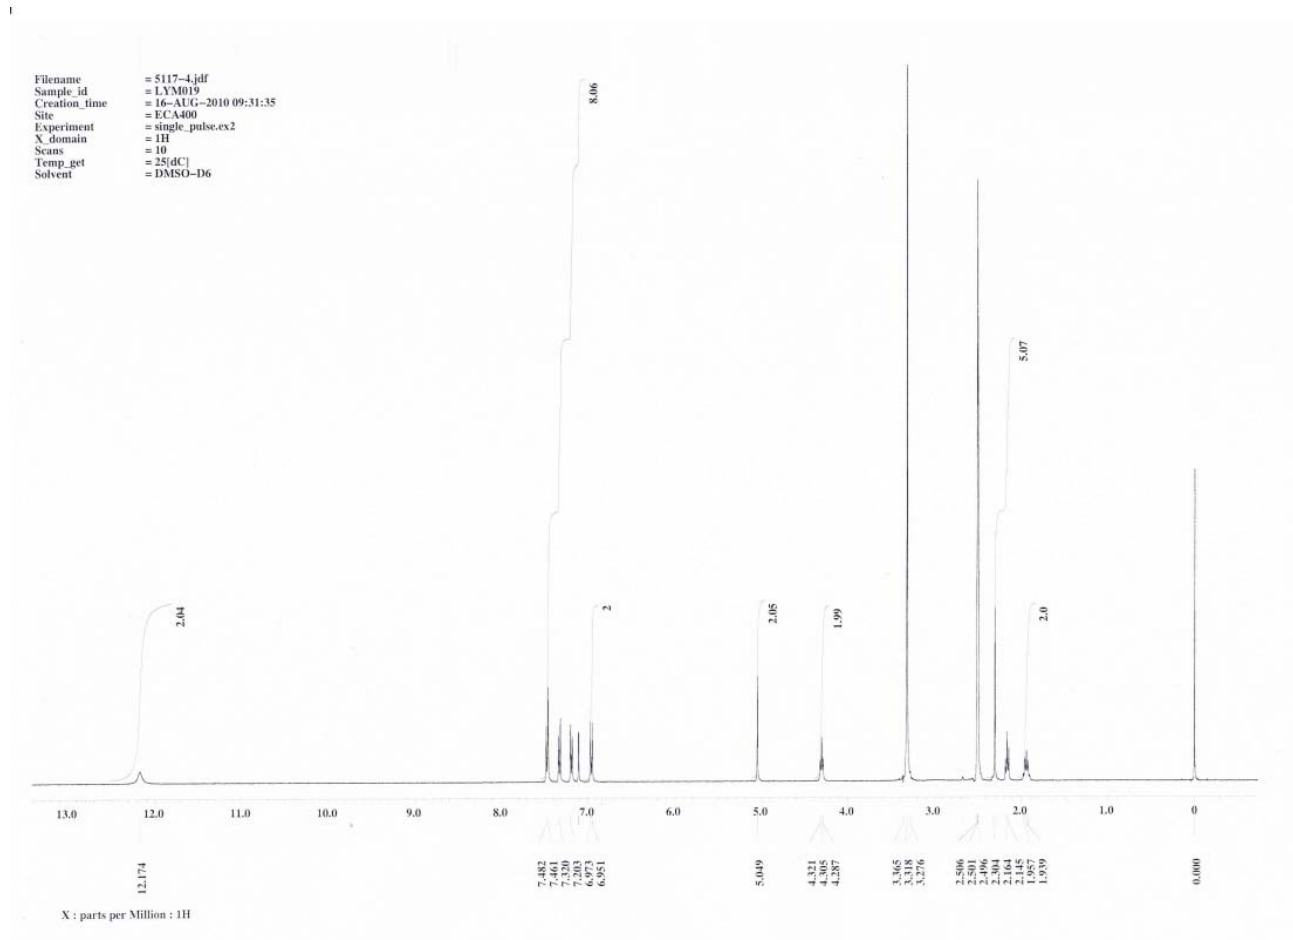The  $^1\text{H}$ -NMR spectrum of LYM019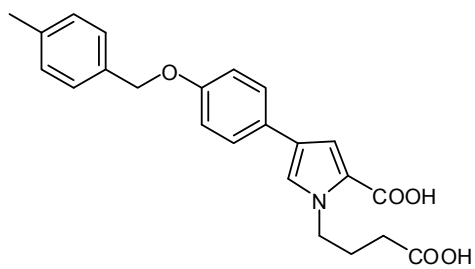

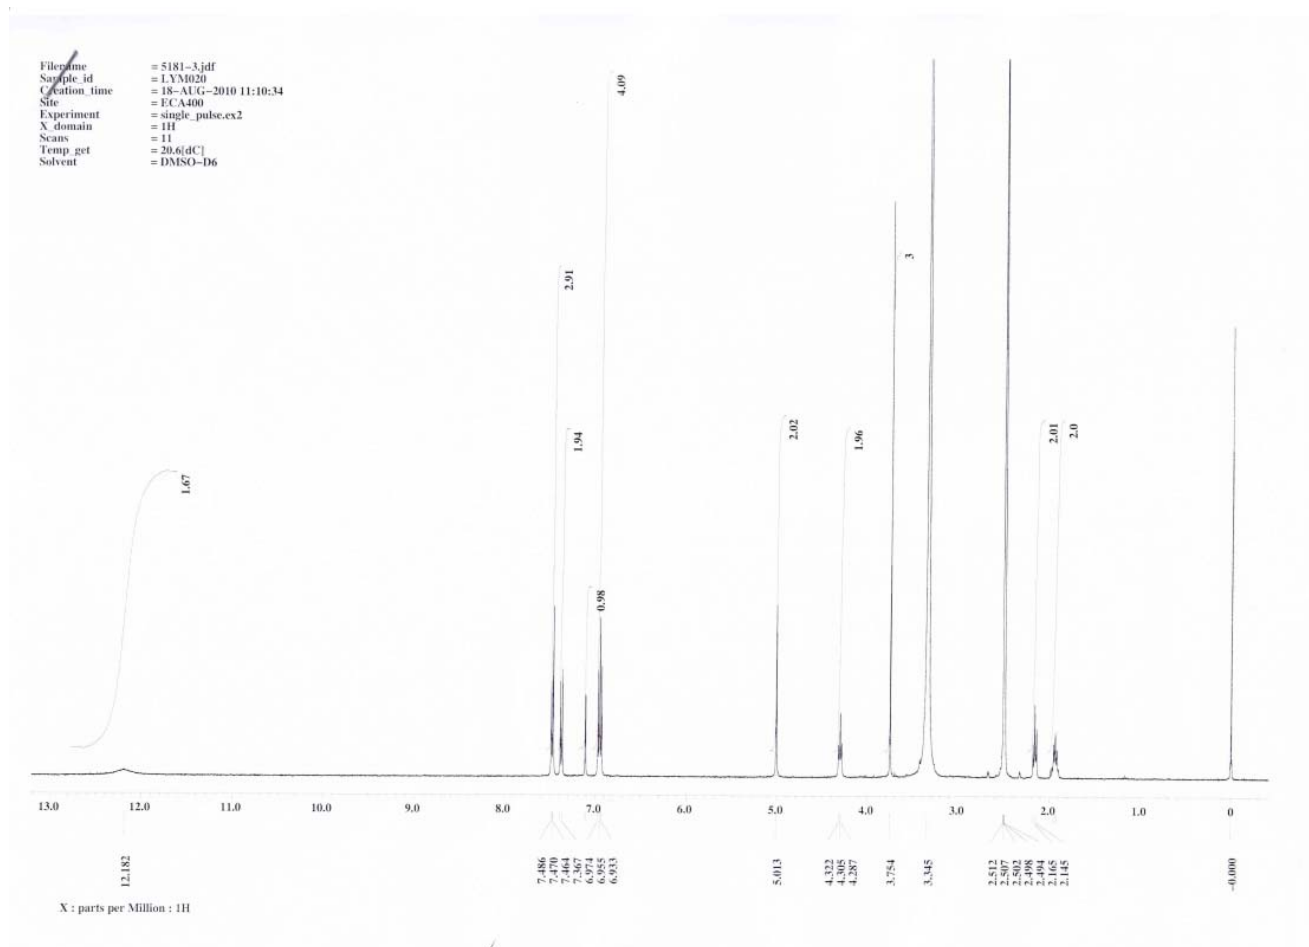The  $^1\text{H}$ -NMR spectrum of LYM020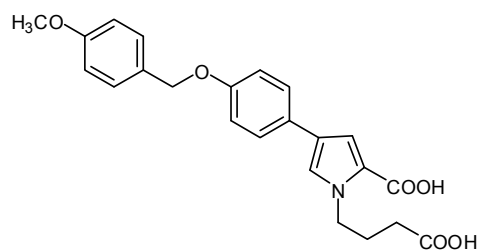

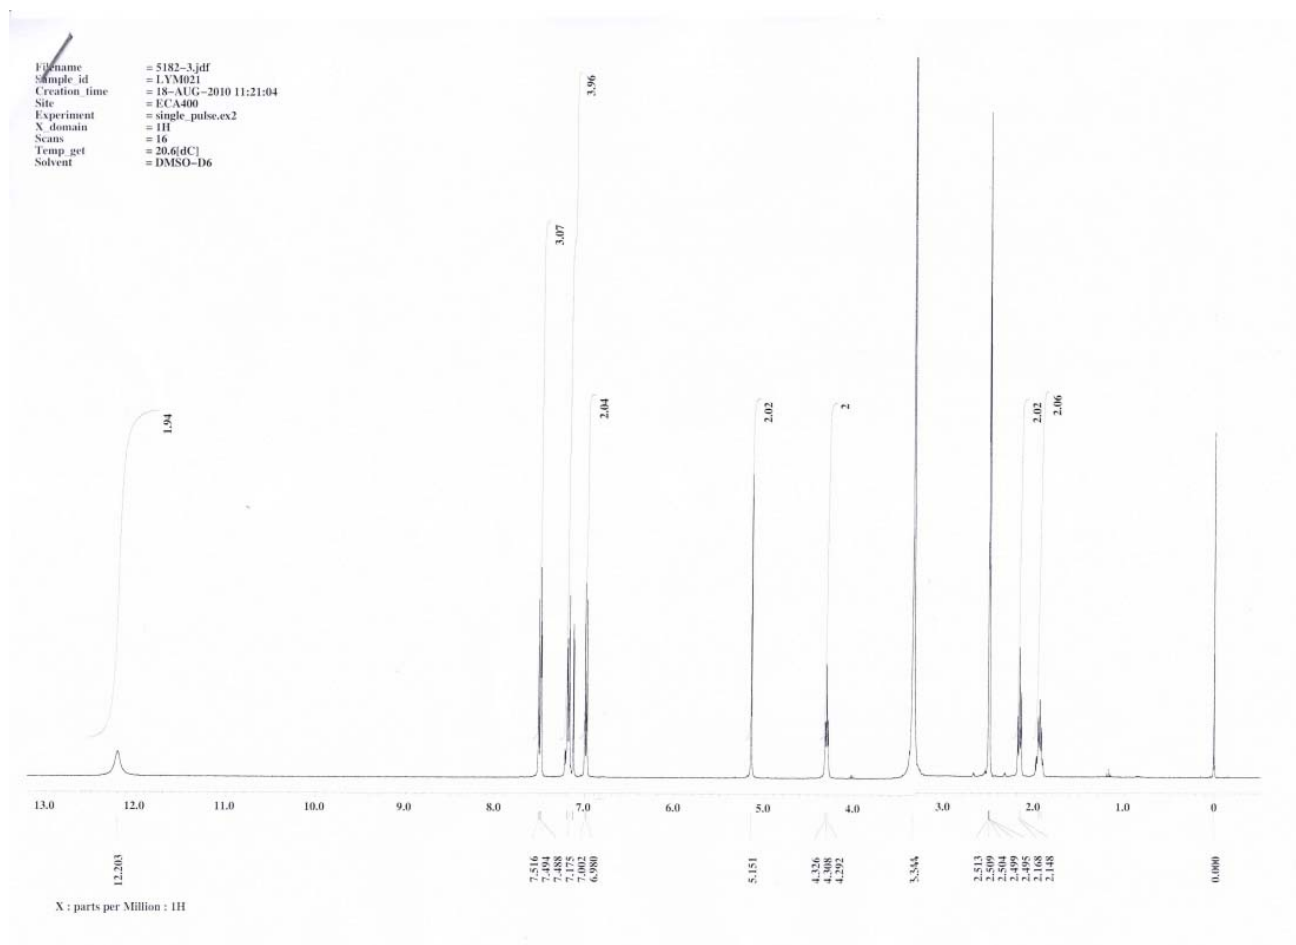The  $^1\text{H}$ -NMR spectrum of LYM021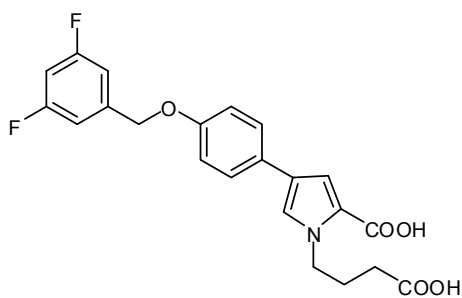

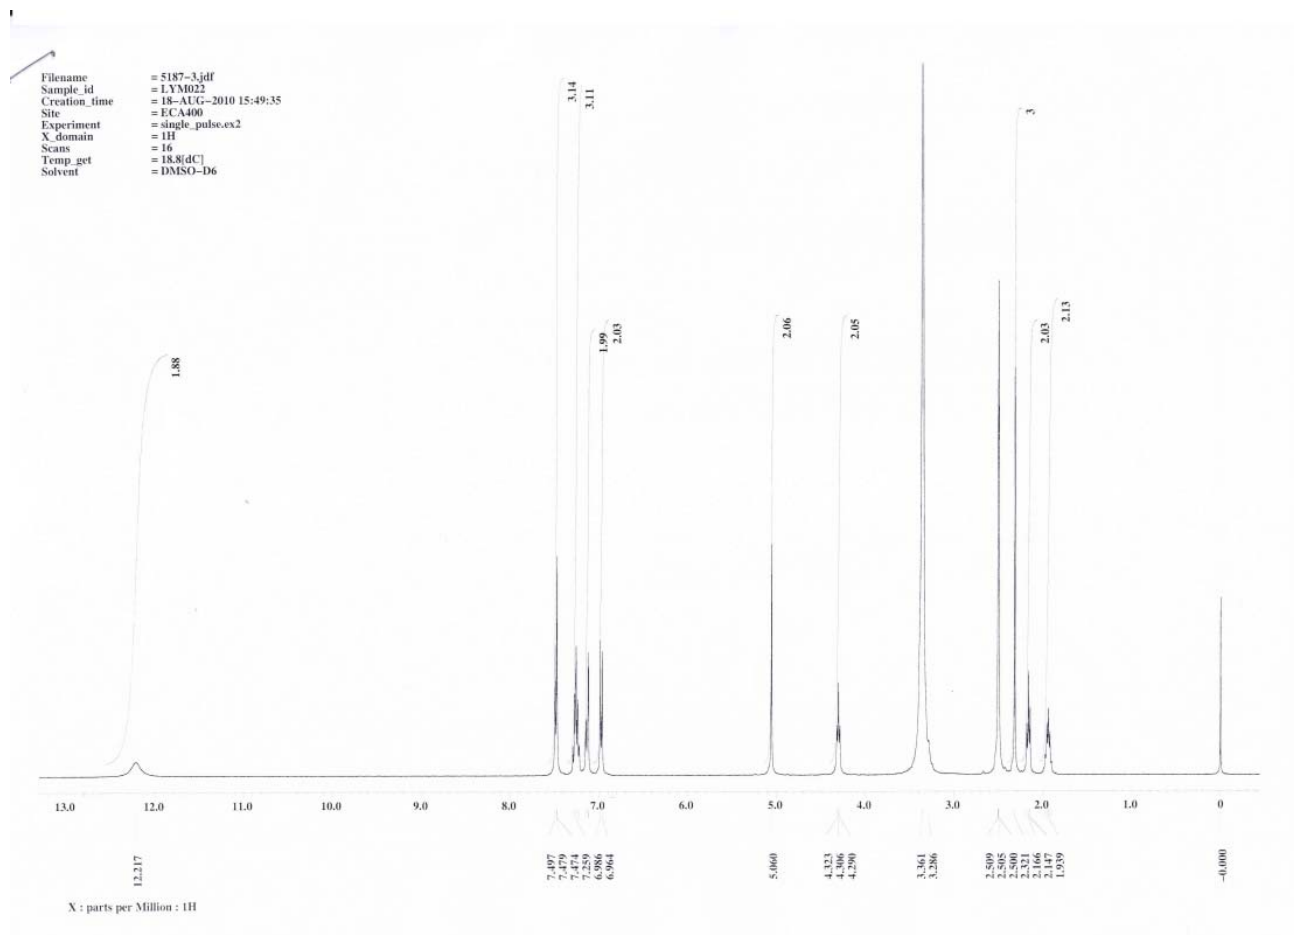The  $^1\text{H}$ -NMR spectrum of LYM022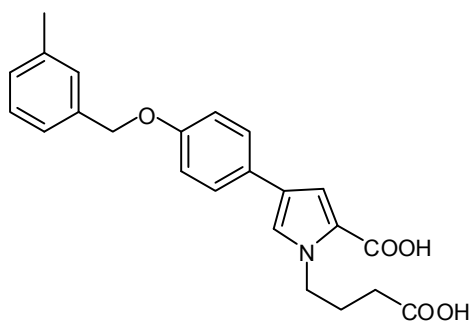

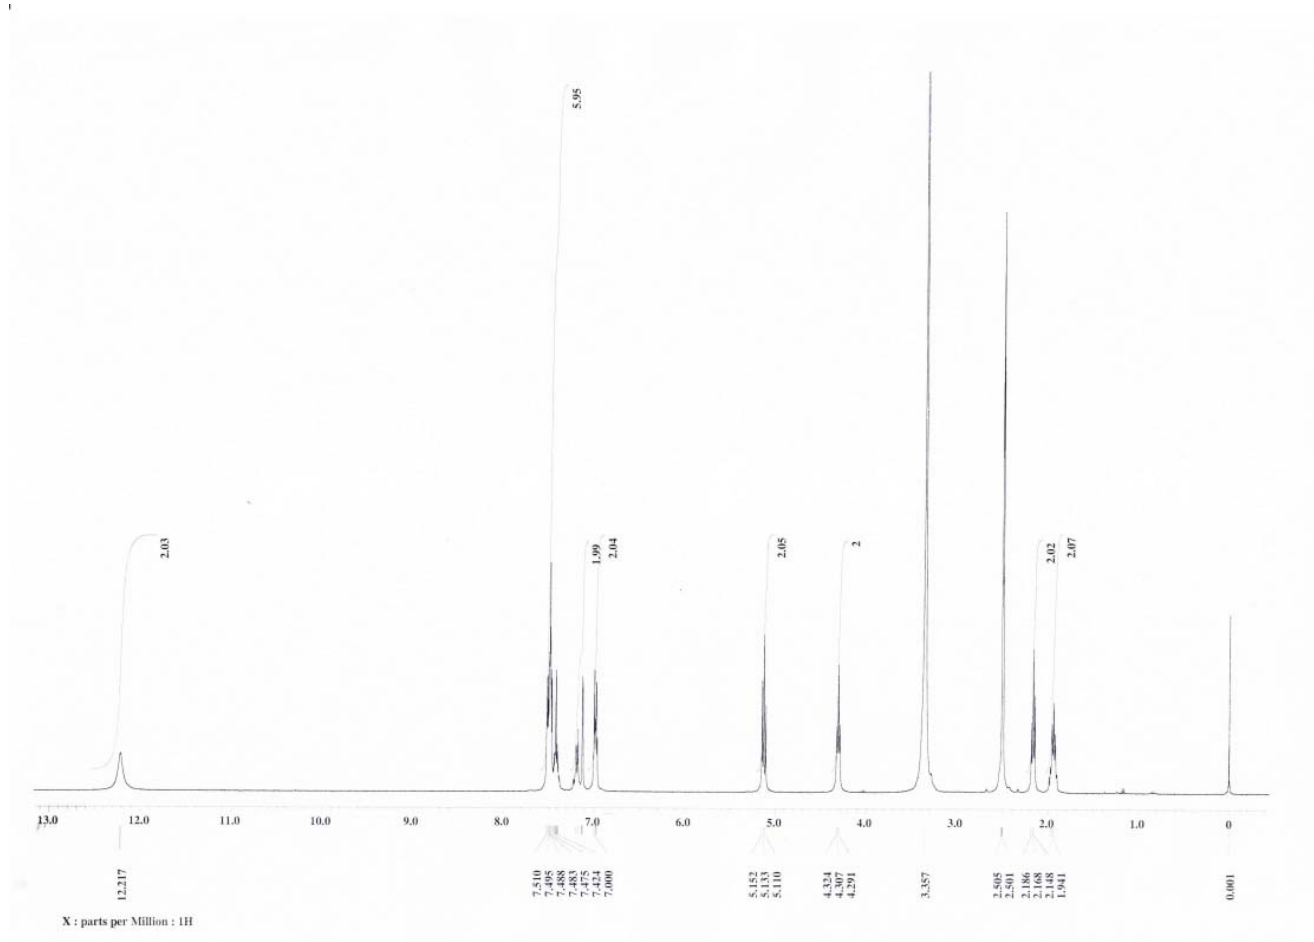

The  $^1\text{H}$ -NMR spectrum of LYM023

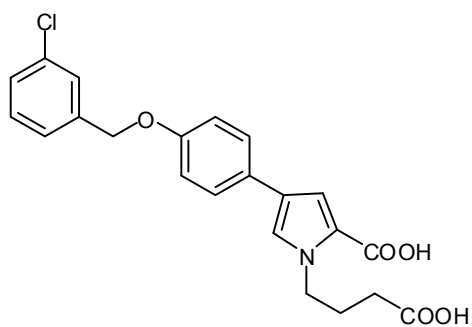

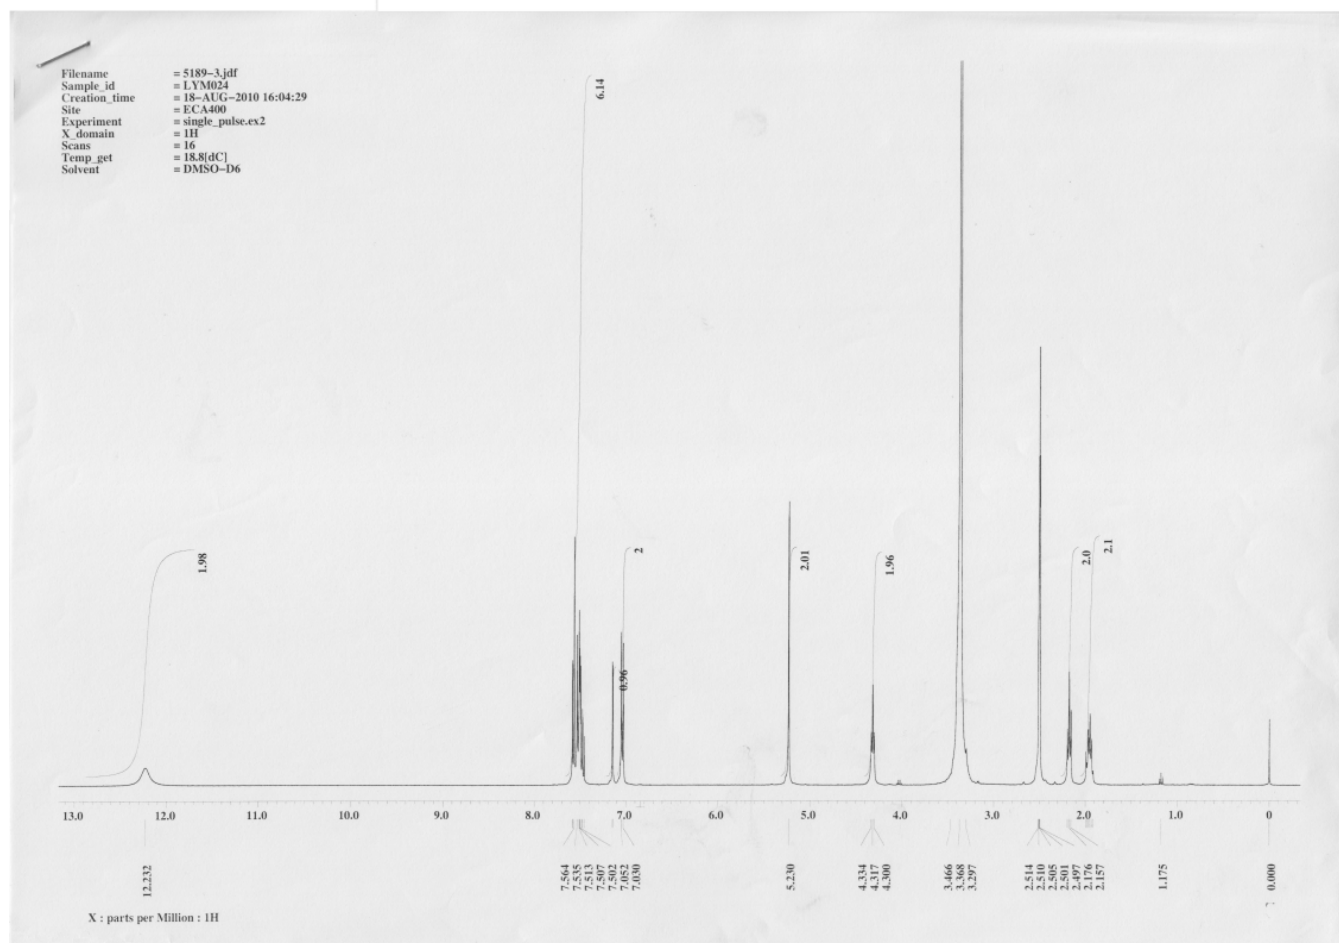The  $^1\text{H}$ -NMR spectrum of LYM024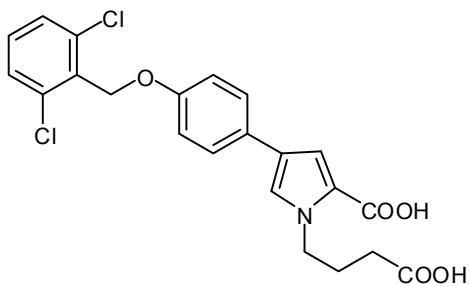

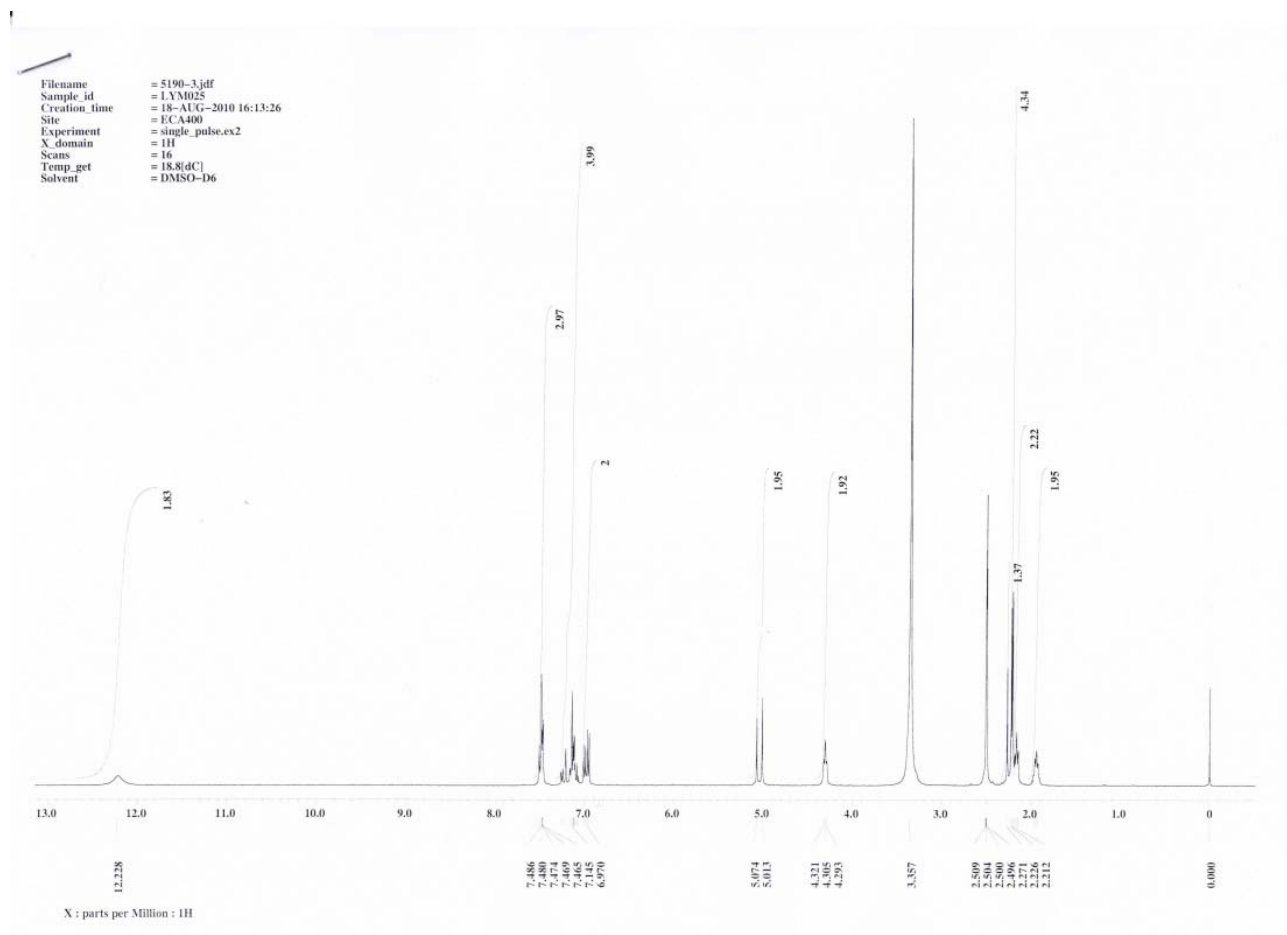The  $^1\text{H}$ -NMR spectrum of LYM025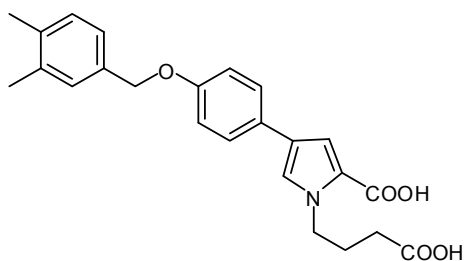

Supplement: s1 [file s1]
